1 **Calaxin is essential for the transmission of Ca<sup>2+</sup>-dependent asymmetric**  
2 **waves in sperm flagella**

3

4 Kogiku Shiba<sup>1\*</sup>, Shoji A Baba<sup>2</sup>, Eiji Fujiwara<sup>3</sup> and Kazuo Inaba<sup>1</sup>

5 <sup>1</sup> Shimoda Marine Research Center, University of Tsukuba, Japan

6 <sup>2</sup> Ochanomizu University, Japan

7 <sup>3</sup> Documentary Channel Co. Ltd., Japan

8 \*Corresponding author: e-mail, [kogiku@shimoda.tsukuba.ac.jp](mailto:kogiku@shimoda.tsukuba.ac.jp)

9 Key word; calaxin, dynein, caged ATP, flagellar and ciliary movement

10

11 **ABSTRACT:** Regulation of waveform asymmetry in sperm flagella is critical for  
12 changes in sperm swimming trajectory as seen during sperm chemotaxis towards eggs.  
13 Ca<sup>2+</sup> is known as an important regulator of asymmetry in flagellar waveforms. A calcium  
14 sensor protein, calaxin, which is associated with the outer arm dynein, plays a key role in  
15 the sperm waveform regulation in a Ca<sup>2+</sup>-dependent manner. However, the molecular  
16 mechanism underlying the regulation of asymmetric waves by Ca<sup>2+</sup> and calaxin remains  
17 unclear. We performed experiments using caged ATP to elucidate the formation and  
18 propagation of asymmetric flagellar waves in the sperm of the ascidian *Ciona intestinalis*.  
19 Demembrated sperm cells were suspended in a solution containing caged ATP and  
20 reactivated using UV flash photolysis. Initial bends were formed at the base and  
21 propagated towards the tip of flagella; however, the bend direction was different between  
22 asymmetric and symmetric waves. A calaxin inhibitor, repaglinide, had no effect on initial

1 bend formation, but significantly inhibited the generation of the second flagellar bend in  
2 the reverse direction, resulting in the failure of asymmetric wave formation and  
3 propagation. These results suggest that calaxin plays a critical role in  $\text{Ca}^{2+}$ -dependent  
4 transmission of flagellar asymmetric waveforms.

5

## 6 **INTRODUCTION:**

7 Changes in the bending pattern of cilia and flagella are important for the regulation of  
8 cell movements and extracellular fluid flow (Inaba, 2015). In particular, the sperm  
9 flagellar waveform is generally composed of two bends: a principal bend (P-bend) and a  
10 reverse bend (R-bend) (Goldstein, 1977, Brokaw, 1979, Gibbons and Gibbons, 1980,  
11 Inaba and Shiba, 2018). When the radii of curvature of two opposite flagellar bends are  
12 almost the same, sperm cells generate symmetric waveforms and swim straight. On the  
13 other hand, when the radius of curvature of the P-bend is much larger than that of the R-  
14 bend, sperm cells generate highly asymmetric waveforms, resulting in circular  
15 movements. The regulation of asymmetry in sperm flagellar waveforms is critical for the  
16 changes of sperm swimming direction, as seen during sperm chemotaxis towards the eggs  
17 (Miller, 1985, Wachten et al., 2017, Yoshida and Yoshida, 2011).

18  $\text{Ca}^{2+}$  is known to play a key role in the regulation of asymmetry in flagellar  
19 waveforms. For instance, the flagellar waveforms in demembrated models of sea urchin  
20 sperm cells change from symmetric to asymmetric with increasing  $\text{Ca}^{2+}$  concentrations  
21 (Brokaw, 1979, Gibbons and Gibbons, 1980). Such a change is implied in the process of  
22 egg fertilisation, as  $\text{Ca}^{2+}$  bursts induce highly asymmetric waveforms during sperm

1 chemotaxis, thereby inducing turning of sperm towards the egg in ascidians and sea  
2 urchins (Shiba et al., 2008, Guerrero et al., 2010, Bohmer et al., 2005, Wood et al., 2005).  
3 However, the  $\text{Ca}^{2+}$ -dependent molecular mechanism regulating the formation and  
4 propagation of asymmetric waves remains unclear.

5 We previously identified a novel  $\text{Ca}^{2+}$ -binding axonemal protein, calaxin, in the  
6 sperm of the ascidian *Ciona intestinalis* (recently renamed *C. intestinalis* type A or *Ciona*  
7 *robusta*). Calaxin is a member of the neuronal calcium sensor (NCS) family and directly  
8 interacts with outer arm dynein (Mizuno et al., 2009). Notably, inhibition of calaxin with  
9 a specific NCS inhibitor, repaglinide, suppresses the propagation of asymmetric flagellar  
10 waveforms required for chemotactic turn, although a transient increase in intracellular  
11  $\text{Ca}^{2+}$  during the turning movement normally occurs (Mizuno et al., 2012). However, the  
12 mechanism by which calaxin contributes to the regulation of asymmetric wave formation  
13 remains largely unexplored. To fill this knowledge gap, we performed experiments using  
14 caged ATP to capture instantaneous images of the formation and propagation of  
15 asymmetric waves. Our results elucidated the mechanism by which asymmetric waves  
16 form and propagate, as well as the importance of calaxin for their regulation. These  
17 findings open new avenues towards a mechanistic understanding of flagellar motility,  
18 with possible applications in the fields of reproductive medicine and technology.

19

## 20 **RESULTS:**

21 To elucidate the mechanism underpinning the formation and propagation of asymmetric  
22 flagellar waves, we performed experiments using caged ATP to capture initial bend

1 formation and subsequent propagation. In particular, demembranated *Ciona* sperm was  
2 incubated with 1 mM of caged ATP, and then reactivated using UV flash photolysis. This  
3 method allows the release of ATP from its caged compound by the UV flash within a few  
4 seconds (McCray et al., 1980, Goldman et al., 1982). To record the changes in sperm  
5 flagellar waveforms upon UV flashing, we used a phase-contrast microscope with a red  
6 LED for illumination and captured the images using a high-speed camera, to which the  
7 LED pulse was synchronised. UV flashes were applied through the objective lens by an  
8 UV LED located in the lamp house for observation of fluorescence.

9           First, we estimated the concentration of ATP released from caged ATP after UV  
10 flashing by measuring flagellar beat frequency. The beat frequency of demembranated  
11 sperm that had been reactivated with 1 mM of caged ATP and a 150 ms UV flash was  
12 estimated to be approximately 10 Hz (Fig. 1A). Notably, sperm beat frequency did not  
13 significantly differ between solutions with low (pCa10) and high (pCa5)  $\text{Ca}^{2+}$   
14 concentrations. Further, we measured the beat frequency of demembranated and  
15 reactivated sperm at various concentrations of Mg-ATP (Fig. 1B). From the calibration  
16 curve, we estimated that ~0.1 mM of ATP was released under these conditions.

17           Next, we analysed the formation and propagation of flagellar waveforms upon  
18 ATP release. At a low  $\text{Ca}^{2+}$  concentration, released ATP induced the formation of an initial  
19 bend at the base of the flagellum 100–150 ms after the UV flash (Fig. 2A, Table 1, Movie  
20 S1). The bend propagated towards the flagellar tip, and the formation of a second bend  
21 was observed within 200 ms. Interestingly, low and high  $\text{Ca}^{2+}$  concentrations induced  
22 symmetric and asymmetric waveforms, respectively (Gibbons and Gibbons, 1980,

1 Brokaw, 1979, Inaba and Shiba, 2018). Similar response times were observed in the  
2 formation and propagation of flagellar waveforms at high concentrations of  $\text{Ca}^{2+}$ ,  
3 although the curvature of the initial bend was larger than that of the second one (Fig. 2B,  
4 Table 1, Movie S2).

5 We previously reported that calaxin is an important factor regulating the  
6 propagation of asymmetric waveforms (Mizuno et al., 2012). Therefore, here we  
7 examined the role of calaxin in bend formation and propagation during initial generation  
8 of asymmetric flagellar waves through the use of a calaxin inhibitor, repaglinide.  
9 Repaglinide is an inhibitor of NCS family proteins (Okada et al., 2003), which  
10 specifically binds to calaxin and inhibits sperm chemotaxis in *Ciona* sperm flagella  
11 (Mizuno et al., 2012). Demembrated sperm cells were incubated with caged ATP and  
12 repaglinide and irradiated with UV light to induce ATP release. The process of initial bend  
13 formation and propagation was recorded at both low and high  $\text{Ca}^{2+}$  concentrations. At  
14 low concentrations of  $\text{Ca}^{2+}$ , both the initial bend and the second bend were formed  
15 normally; however, such formation occurred a little later (~250 ms) upon repaglinide  
16 treatment when compared to that in the control (Fig. 3A, Table 1, Movie 3). Moreover,  
17 the maximum curvature after UV flashing was significantly smaller in the flagella of  
18 repaglinide-treated sperm than in the absence of repaglinide (Table 1). In addition, at a  
19 high concentration of  $\text{Ca}^{2+}$  in the presence of repaglinide, the initial bend was formed, but  
20 did not propagate to the flagellar tip (Fig. 3B, Movie S4). On the other hand, in the  
21 absence of repaglinide, the bend formed at the base and then increased its curvature, but  
22 the curvature at the posterior region remained quite limited. Moreover, the flagellum

1 never formed the second bend, reflecting a quiescence pattern that was previously  
2 reported in sea urchin sperm (Goldstein, 1979; Gibbons and Gibbons, 1980). Therefore,  
3 the flagellum continued to vibrate at a high frequency with an overall constant waveform  
4 (Movie S4).

5           Interestingly, we found that the initial bends of sperm reactivated at low  $\text{Ca}^{2+}$   
6 concentrations consisted mostly of R-bends (Fig. 2A). In contrast, the initial bends  
7 formed in the sperm reactivated at high  $\text{Ca}^{2+}$  concentrations were almost exclusively P-  
8 bends (Fig. 2B). The same pattern was also observed in the presence of repaglinide (Fig.  
9 3A and 3B). Moreover, quantitative analysis showed that ~80–90% of the sperm flagella  
10 formed an initial bend in this manner (Fig. 4), suggesting that the direction of the initial  
11 bend depends on  $\text{Ca}^{2+}$ .

12           For a better understanding of the process of flagellar bend formation, the  
13 changes in flagellar curvature were plotted against time and distance from the flagellar  
14 base in a three-dimensional (3D) graph (Fig. 5). At low  $\text{Ca}^{2+}$  concentrations, R-bends  
15 were generated at the flagellar base and propagated to the tip, followed by generation and  
16 propagation of P-bends (Fig. 5A). On the other hand, P-bend formation preceded R-bend  
17 generation at high  $\text{Ca}^{2+}$  concentrations (Fig. 5B). Repaglinide had little effect on the  
18 overall pattern of bend formation at low  $\text{Ca}^{2+}$  concentrations, although the propagation of  
19 R-bend proceeded more slowly and, consequently, the formation of the second bend (P-  
20 bend) was delayed (Fig. 5C, Table 1). Conversely, at high  $\text{Ca}^{2+}$  concentrations,  
21 repaglinide did not inhibit the generation of P-bends at the flagellar base, but suppressed  
22 both their propagation and the subsequent formation of R-bends. In these conditions, P-

1 bends were formed completely  $\sim$ 150 ms after UV flashing and maintained a constant  
2 curvature for up to 325 ms (Fig. 5D). When observing the vibration of the flagellum  
3 (Movie S4), the curvature of the P-bend oscillated with a periodicity of 5–40 ms and a  
4 frequency of  $75.14 \pm 7.49$  Hz ( $N = 6$ ) (Asterisks in Fig. 5D; Table 1).

5

## 6 **DISCUSSION:**

7 Periodical flagellar oscillation is regulated by a highly sophisticated machinery composed  
8 of dynein motors, microtubules, and other regulatory factors (Inaba, 2003). In particular,  
9 local sliding between doublet microtubules by dyneins is essential for bend formation  
10 (Shingyoji et al., 1977). Indeed, coordinated activation or inactivation of dyneins within  
11 nine sets of doublet microtubules along the flagella controls the bend curvature, bending  
12 direction, wavelength, and propagation velocity (Inaba, 2011, Lin and Nicastro, 2018,  
13 King, 2018). For instance, switching of dynein activity between doublet 7 and 3 is thought  
14 to be responsible for the periodical and planar oscillation of sperm flagella. Although this  
15 switching is considered to be precisely regulated by chemical and mechanical signals, the  
16 details of this regulatory mechanism remain unclear.

17 In this study we developed a microscopic illumination system using LED light  
18 and applied it to examine the initiation and subsequent propagation of flagellar bends  
19 induced by caged ATP. This experimental system is very useful for observing the  
20 formation and propagation of flagellar waveforms without physical disturbances such as  
21 fluid flow and mechanical stimuli (Vernon and Woolley, 1994, Tani and Kamimura, 1998,  
22 Hayashi and Shingyoji, 2008). Moreover, photolysis of caged ATP can induce the sliding

1 of microtubules at the desired time. Subsequently, the mechanical load at the base of the  
2 flagellum converts such sliding into the formation of the first bend at the proximal region.  
3 Thus, our system allows to capture the moment of first bend formation.

4           With this experimental setting, we found that the first bend of symmetric or  
5 asymmetric waves formed at the proximal region of the flagellum is predominantly an R-  
6 bend or a P-bend, respectively (Figs 4 and 5). Studies in sea urchins showed that the  
7 formation of P-bends and R-bends is induced by the activation of dyneins on doublet 7  
8 and 3, respectively (Sale, 1986, Shingyoji, 2018). Therefore, the initiation of the first R-  
9 bend in a symmetric flagellar wave under low  $Ca^{2+}$  conditions in *Ciona* (Fig. 2A) might  
10 be induced by the activation of dyneins on doublet 3 as well. Moreover, the formation of  
11 a second P-bend at the base of the flagellum after propagation of the R-bend towards the  
12 flagellar tip might depend on the switch of active dyneins from doublet 3 to doublet 7  
13 (Fig. 6, left).

14           On the other hand, high  $Ca^{2+}$  specifically suppresses the activation of doublet  
15 3 dyneins and attenuates the formation of R-bends in sea urchin sperm flagella (Nakano  
16 et al., 2003). Similarly, in *Ciona* sperm, bend initiation occurs with the formation of a P-  
17 bend at the proximal region of the flagellum under high  $Ca^{2+}$  conditions, followed by the  
18 propagation of such P-bend and the formation of an R-bend at the flagellar base (Figs 2  
19 and 4). Therefore, we suggest that, following  $Ca^{2+}$  bursts, the activation of dyneins occur  
20 predominantly on doublet 7, thereby inducing an initial P-bend at the proximal region of  
21 the flagellum. Subsequent formation of the small R-bend near the base of the flagellum  
22 would follow the activation of dyneins on doublet 3. On the other hand, the sliding of



1 doublet 3 (R-bend) would be suppressed under high  $\text{Ca}^{2+}$  conditions, resulting in the  
2 formation of an asymmetric wave (Fig. 6, middle).

3 Moreover, the specific role of the  $\text{Ca}^{2+}$ -binding protein calaxin in this  
4 mechanism could be dissected through the use of the NCS inhibitor repaglinide. In the  
5 presence of repaglinide, the initial P-bend was normally formed under high  $\text{Ca}^{2+}$   
6 conditions. However, it did not propagate and, as a consequence, the R-bend never  
7 appeared (Fig. 3B and 5D). Therefore, calaxin is probably essential for the activation of  
8 doublet 3 dyneins to form R-bends, but not for the activation of doublet 7 dyneins to form  
9 P-bends (Fig. 6, right). Considering also the results relative to low  $\text{Ca}^{2+}$  concentrations,  
10 we propose that calaxin is primarily involved in the regulation of R-bend formation and  
11 propagation.

12 To complete the model depicted in Fig. 6, three key questions need to be  
13 addressed. First, the mechanism by which R-bend is initially formed by the sliding of  
14 doublet 3 at the proximal region of the flagellum in low  $\text{Ca}^{2+}$  conditions should be  
15 investigated. Indeed, flagellar bends are formed through the conversion of microtubule  
16 sliding into bending of physical structures by mechanical resistance (Shingyoji et al.,  
17 1977). Therefore, the preference of doublet 3 sliding during the initial steps of bend  
18 formation could be due to the difference in mechanical sensitivity between the sliding of  
19 doublets 3 and 7. In fact, the preference for R-bends during bend initiation has also been  
20 shown to occur during flagellar beating induced by head vibration in sea urchin sperm  
21 (Eshel et al., 1991). It is possible that asymmetric structures in the axoneme, such as the  
22 central pair apparatus (CP) / radial spokes (RS), determine such an initial preference.

1           Secondly, it would be interesting to know if the P-bend can be formed under  
2 high  $\text{Ca}^{2+}$  conditions (Fig. 6, middle). We previously demonstrated by an *in vitro* motility  
3 assay using purified microtubules and outer arm dynein that dynein-mediated  
4 microtubule sliding was suppressed by calaxin under high  $\text{Ca}^{2+}$  conditions (Mizuno et al.,  
5 2012). Since calaxin is associated with outer arm dyneins on all nine doublet microtubules  
6 (Mizuno et al., 2009), there must be a mechanism mediating the relief of calaxin-  
7 dependent inhibition of doublet 7 sliding. It is possible that the activity of doublet 7  
8 dynein is regulated by CP/RS, which possibly relieves the  $\text{Ca}^{2+}$ /calaxin-dependent  
9 inhibition of outer arm dynein through protein phosphorylation, similar to their known  
10 role in the modulation of the activity of inner arm dynein (Habermacher and Sale, 1997,  
11 King and Dutcher, 1997, Smith and Yang, 2004). Therefore, the activation of doublet 7  
12 dynein under high  $\text{Ca}^{2+}$  conditions might occur by a calaxin-independent mechanism.  
13 However, other calcium-binding proteins, calmodulin and centrin, are known to be  
14 localised in these structures (Yang et al., 2001, Dymek and Smith, 2007) as well as in  
15 inner arm dyneins (Piperno et al., 1992, Yamamoto et al., 2008, Yagi et al., 2009).

16           Thirdly, it is worth investigating the mechanism by which repaglinide inhibits  
17 both the formation and the propagation of R-bends under high  $\text{Ca}^{2+}$  conditions (Fig. 6,  
18 right). We previously showed that repaglinide rescues calaxin-dependent inhibition of  
19 microtubule sliding in *in vitro* motility assays (Mizuno et al., 2012). These results imply  
20 the existence of a mechanism for the inhibition of microtubule sliding on doublet 3  
21 dyneins driving the formation and propagation of R-bends. Although this has not yet been  
22 elucidated, we speculate that the formation of P-bends exerts a mechanical load on the

1 proximal region, where calaxin is essential for the activation of doublet 3 dyneins and the  
2 induction of microtubule sliding, triggering the formation of R-bends under the loaded  
3 state. Repaglinide would inhibit this activity of calaxin, resulting in the suppression of R-  
4 bend formation and propagation (Fig. 6, right).

5 In conclusion, the formation and propagation of asymmetric waves in sperm flagella  
6 depend on  $\text{Ca}^{2+}$  concentration and calaxin activity, although the detailed mechanism is  
7 yet to be elucidated. Possibly,  $\text{Ca}^{2+}$ /calaxin-dependent regulation of dynein activity might  
8 play a key role in determining the unequal activity of microtubule sliding between the  
9 two sides of the flagellum. Further studies on the role of calaxin in the regulation of outer  
10 arm dyneins by mechanical loading or phosphorylation will shed light on the oscillatory  
11 mechanism of flagellar and ciliary movement.

12

## 13 **MATERIAL AND METHODS:**

### 14 *Materials*

15 The ascidian *C. intestinalis* (type A; also called *C. robusta*) was collected from Onagawa  
16 Bay near the Onagawa Field Research Center, Tohoku University or obtained from the  
17 National BioResource Project for *Ciona* (<http://marinebio.nbrp.jp/>). Animals were kept  
18 in aquaria under constant light for accumulation of gametes without spontaneous  
19 spawning. Semen samples were collected by dissecting the sperm duct and kept on ice  
20 until use.

21

### 22 *Chemical and solutions*

1 Ca<sup>2+</sup>-free sea water (CFSW) contained 478.2 mM NaCl, 9.39 mM KCl, 48.27 mM MgCl<sub>2</sub>,  
2 2.5 mM EGTA and 10 mM Hepes-NaOH (pH 8.0). Sperm demembration solution  
3 contained 0.2 M potassium acetate, 1 mM MgSO<sub>4</sub>, 2.5 mM EGTA, 20 mM Tris-acetate  
4 (pH 7.8), 0.04% Triton X-100 and 1 mM DTT. Pre-incubation buffer contained 0.15 M  
5 potassium acetate, 2 mM MgSO<sub>4</sub>, 2.5 mM EGTA, 39 μM (pCa10) or 2.51 mM (pCa5)  
6 CaCl<sub>2</sub>, 50 mM Tris-HCl (pH8.0) and 1 mM DTT. Reactivation solution was the same as  
7 pre-incubation buffer but with 2 mM ATP. Free Ca<sup>2+</sup> concentration was assessed by  
8 CALCON (<http://www.bio.chuo-u.ac.jp/nano/calcon.html>). Caged ATP was purchased  
9 from Dojindo (Kumamoto, Japan) dissolved in Pre-incubation buffer. Repaglinide was  
10 purchased from Sigma-Aldrich (St Louis, MO) and dissolved in dimethyl sulfoxide  
11 (DMSO). Theophylline from Sigma-Aldrich was dissolved in CFSW. Other reagents  
12 were of analytical grades.

13

#### 14 *Preparation of demembrated sperm*

15 Demembration and reactivation of *C. intestinalis* sperm were performed as described  
16 previously with some modifications (Mizuno et al., 2012). Semen was suspended in 100  
17 volumes of CFSW containing 1 mM theophylline in CFSW to activate motility and  
18 incubated for 5 min at 25°C. Sperm were demembrated with 10 volumes of  
19 demembration solution incubated for 3 min at 25°C. Demembrated sperm were kept  
20 for several minutes in pre-incubation buffer with or without 1 mM caged ATP until use.  
21 Demembrated sperm incubated with caged ATP were reactivated by UV irradiation.  
22 Demembrated sperm without caged ATP were reactivated with the same volume of the

1 reactivation buffer containing 2 mM ATP (Final ATP concentration was 1 mM). DMSO  
2 (control) or Repaglinide was added to the demembration solution, pre-incubation  
3 buffer and reactivation buffer. DMSO concentration was kept below 0.5% in all  
4 experiments.

5

### 6 *Experimental system*

7 Movements of demembrated sperm incubated with caged ATP were observed under an  
8 inverted microscope with phase optics (IX71, Olympus, Tokyo, Japan) with a 20x  
9 objective and recorded with a high-speed CCD camera (HAS220, Detect, Tokyo, Japan).  
10 Flagellar waveforms were captured by a red-LED (Edison 3WStar, Taipei, Taiwan) and a  
11 laboratory-made LED stroboscopic illumination system synchronized with the exposure  
12 signals from the high-speed camera. Images were taken at a frame rate of 200 fps with  
13 0.2 msec pulse from the red LED. A UV-LED (NS365L-3SVR, 365 nm, Nitride  
14 Semiconductors, Tokushima, Japan) was used for the photolysis of caged ATP. A mercury  
15 lamp in the lamp house of the microscope was replaced by a laboratory-made LED holder  
16 with UV-LED. A laboratory-made LED controller generated a 150 msec pulse for UV  
17 irradiation and triggered a recording cue signal on the high-speed camera (HAS220)  
18 which enables to record images 0.25 sec before and 2.25 sec after UV irradiation. To  
19 measure the flagellar beat frequency of reactivated sperm with Mg-ATP flagellar  
20 waveforms were observed under an upright microscope with phase optics (BX51,  
21 Olympus) with a 20x objective and recorded with a high-speed CCD camera (HAS-D3,  
22 Detect) at 500 fps.

1

2 *Analysis of flagellar waveforms*

3 The flagellar beat frequency and the flagellar curvature were analyzed using Bohboh  
4 software (Bohbohsoft, Tokyo, Japan). Individual images of sperm flagella were tracked  
5 automatically, and their curvatures calculated based on the method of Baba and Mogami  
6 (1985). Pseudocolor-maps of the flagellar curvature along the distance and time were  
7 created using by gnuplot 5.0 (<http://www.gnuplot.info/>).

8

9 *Statistical Analysis*

10 All experiments were repeated at least three times with three different specimens. Data is  
11 expressed as means  $\pm$  SE. Statistical significance was calculated using Student's t-test;  
12  $P < 0.05$  was considered significant.

13

14 **ACKNOWLEDGEMENTS:**

15 We thank Drs Satoe Aratake, Reiko Yoshida, Manabu Yoshida, Yutaka Satou and other  
16 staff at Misaki Marine Biological Station, Grad Schl of Sci, University of Tokyo and in  
17 Lab of Dev Genomics, Grad Schl of Sci, Kyoto University, who distribute *Ciona* under  
18 the National BioResource Project, AMED, Japan. We are grateful to all the staff members  
19 of Onagawa Field Center, Graduate School of Agricultural Science, Tohoku University  
20 and International Coastal Research Center, University of Tokyo for supplying *Ciona*.  
21 This work was supported in part by grants from MEXT (Ministry of Education, Culture,  
22 Sports, Science and Technology), Japan for Innovative Areas (No. 15H01201) and

1 Scientific Research (B) (No. 22370023) to K.I. and for Scientific Research (C) (No.  
2 19K06592, No. 16K07337) K.S. and by JST-BIRD (Japan Science and Technology  
3 Agency-Institute for Bioinformatics Research and Development), Japan to K.I.

4

5 **REFERENCES:**

6 **Baba, S. A. and Mogami, Y.** (1985). An approach to digital image analysis of bending  
7 shapes of eukaryotic flagella and cilia. *Cell Motility*, **5**, 475-489.

8 **Bohmer, M., Van, Q., Weyand, I., Hagen, V., Beyermann, M., Matsumoto, M., Hoshi,**  
9 **M., Hildebrand, E. and Kaupp, U. B.** (2005). Ca<sup>2+</sup> spikes in the flagellum  
10 control chemotactic behavior of sperm. *EMBO J*, **24**, 2741-52.

11 **Brokaw, C. J.** (1979). Calcium-induced asymmetrical beating of triton-demembrated  
12 sea urchin sperm flagella. *J Cell Biol*, **82**, 401-11.

13 **Dymek, E. E. and Smith, E. F.** (2007). A conserved CaM and radial spoke-associated  
14 complex mediates regulation of flagellar dynein activity. *Journal of Cell Biology*,  
15 **179**, 515-526.

16 **Eshel, D., Shingyoji, C., Yoshimura, K., Gibbons, I. R. and Takahashi, K.** (1991).  
17 Evidence for an Inequality in the Forces That Generate Principal and Reverse  
18 Bends in Sperm Flagella. *Journal of Cell Science*, **100**, 213-218.

19 **Gibbons, B. H. and Gibbons, I. R.** (1980). Calcium-induced quiescence in reactivated  
20 sea urchin sperm. *J Cell Biol*, **84**, 13-27.

21 **Goldman, Y. E., Hibberd, M. G., Mccray, J. A. and Trentham, D. R.** (1982).  
22 Relaxation of muscle fibres by photolysis of caged ATP. *Nature*, **300**, 701-5.

23 **Goldstein, S. F.** (1977). Asymmetric waveforms in echinoderm sperm flagella. *J Exp Biol*,  
24 **71**, 157-70.

25 **Guerrero, A., Nishigaki, T., Carneiro, J., Yoshiro, T., Wood, C. D. and Darszon, A.**  
26 (2010). Tuning sperm chemotaxis by calcium burst timing. *Dev Biol*, **344**, 52-65.

27 **Habermacher, G. and Sale, W. S.** (1997). Regulation of flagellar dynein by  
28 phosphorylation of a 138-kD inner arm dynein intermediate chain. *J Cell Biol*,  
29 **136**, 167-76.

30 **Hayashi, S. and Shingyoji, C.** (2008). Mechanism of flagellar oscillation-bending-  
31 induced switching of dynein activity in elastase-treated axonemes of sea urchin

- 1 sperm. *J Cell Sci*, **121**, 2833-43.
- 2 **Inaba, K.** (2003). Molecular architecture of the sperm flagella: molecules for motility  
3 and signaling. *Zool Sci*, **20**, 1043-56.
- 4 **Inaba, K.** (2011). Sperm flagella: comparative and phylogenetic perspectives of protein  
5 components. *Mol Hum Reprod*, **17**, 524-38.
- 6 **Inaba, K.** (2015). Calcium sensors of ciliary outer arm dynein: functions and  
7 phylogenetic considerations for eukaryotic evolution. *Cilia*, **4**, 6.
- 8 **Inaba, K. and Shiba, K.** (2018). Microscopic analysis of sperm movement: links to  
9 mechanisms and protein components. *Microscopy (Oxf)*, **67**, 144-155.
- 10 **King, S. J. and Dutcher, S. K.** (1997). Phosphoregulation of an inner dynein arm  
11 complex in *Chlamydomonas reinhardtii* is altered in phototactic mutant strains. *J*  
12 *Cell Biol*, **136**, 177-91.
- 13 **King, S. M.** (2018). Turning dyneins off bends cilia. *Cytoskeleton (Hoboken)*, **75**, 372-  
14 381.
- 15 **Lin, J. and Nicastro, D.** (2018). Asymmetric distribution and spatial switching of dynein  
16 activity generates ciliary motility. *Science*, **360**.
- 17 **Mccray, J. A., Herbette, L., Kihara, T. and Trentham, D. R.** (1980). A new approach  
18 to time-resolved studies of ATP-requiring biological systems; laser flash  
19 photolysis of caged ATP. *Proc Natl Acad Sci U S A*, **77**, 7237-41.
- 20 **Miller, R. L.** (1985). Demonstration of Sperm Chemotaxis in Echinodermata - Asteroidea,  
21 Holothuroidea, Ophiuroidea. *Journal of Experimental Zoology*, **234**, 383-414.
- 22 **Mizuno, K., Padma, P., Konno, A., Satouh, Y., Ogawa, K. and Inaba, K.** (2009). A  
23 novel neuronal calcium sensor family protein, calaxin, is a potential Ca(2+)-  
24 dependent regulator for the outer arm dynein of metazoan cilia and flagella. *Biol*  
25 *Cell*, **101**, 91-103.
- 26 **Mizuno, K., Shiba, K., Okai, M., Takahashi, Y., Shitaka, Y., Oiwa, K., Tanokura, M.**  
27 **and Inaba, K.** (2012). Calaxin drives sperm chemotaxis by Ca(2+)-mediated  
28 direct modulation of a dynein motor. *Proc Natl Acad Sci U S A*, **109**, 20497-502.
- 29 **Nakano, I., Kobayashi, T., Yoshimura, M. and Shingyoji, C.** (2003). Central-pair-  
30 linked regulation of microtubule sliding by calcium in flagellar axonemes. *J Cell*  
31 *Sci*, **116**, 1627-36.
- 32 **Okada, M., Takezawa, D., Tachibanaki, S., Kawamura, S., Tokumitsu, H. and**  
33 **Kobayashi, R.** (2003). Neuronal calcium sensor proteins are direct targets of the



- 1           insulinotropic agent repaglinide. *Biochem J*, **375**, 87-97.
- 2   **Piperno, G., Mead, K. and Shestak, W.** (1992). The inner dynein arms I2 interact with  
3           a "dynein regulatory complex" in *Chlamydomonas* flagella. *J Cell Biol*, **118**,  
4           1455-63.
- 5   **Sale, W. S.** (1986). The axonemal axis and Ca<sup>2+</sup>-induced asymmetry of active  
6           microtubule sliding in sea urchin sperm tails. *J Cell Biol*, **102**, 2042-52.
- 7   **Shiba, K., Baba, S. A., Inoue, T. and Yoshida, M.** (2008). Ca<sup>2+</sup> bursts occur around a  
8           local minimal concentration of attractant and trigger sperm chemotactic response.  
9           *Proc Natl Acad Sci U S A*, **105**, 19312-7.
- 10   **Shingyoji, C.** (2018). Regulation of dynein-driven ciliary and flagellar movement. *In*:  
11           KING, S. M. (ed.) *Dyneins: Structure, Biology and Disease*. 2nd Edition ed.  
12           Amsterdam, The Netherlands: Elsevier BV.
- 13   **Shingyoji, C., Murakami, A. and Takahashi, K.** (1977). Local reactivation of Triton-  
14           extracted flagella by iontophoretic application of ATP. *Nature*, **265**, 269-70.
- 15   **Smith, E. F. and Yang, P.** (2004). The radial spokes and central apparatus: mechano-  
16           chemical transducers that regulate flagellar motility. *Cell Motil Cytoskeleton*, **57**,  
17           8-17.
- 18   **Tani, T. and Kamimura, S.** (1998). Reactivation of sea-urchin sperm flagella induced  
19           by rapid photolysis of caged ATP. *J Exp Biol*, **201**, 1493-503.
- 20   **Vernon, G. G. and Woolley, D. M.** (1994). Direct Evidence for Tension Development  
21           between Flagellar Doublet Microtubules. *Experimental Cell Research*, **215**, 390-  
22           394.
- 23   **Wachten, D., Jikeli, J. F. and Kaupp, U. B.** (2017). Sperm Sensory Signaling. *Cold*  
24           *Spring Harb Perspect Biol*, **9**.
- 25   **Wood, C. D., Nishigaki, T., Furuta, T., Baba, S. A. and Darszon, A.** (2005). Real-time  
26           analysis of the role of Ca<sup>2+</sup> in flagellar movement and motility in single sea  
27           urchin sperm. *J Cell Biol*, **169**, 725-31.
- 28   **Yagi, T., Uematsu, K., Liu, Z. and Kamiya, R.** (2009). Identification of dyneins that  
29           localize exclusively to the proximal portion of *Chlamydomonas* flagella. *J Cell*  
30           *Sci*, **122**, 1306-14.
- 31   **Yamamoto, R., Yanagisawa, H. A., Yagi, T. and Kamiya, R.** (2008). Novel 44-  
32           kilodalton subunit of axonemal Dynein conserved from *chlamydomonas* to  
33           mammals. *Eukaryot Cell*, **7**, 154-61.

- 1 **Yang, P., Diener, D. R., Rosenbaum, J. L. and Sale, W. S.** (2001). Localization of  
2 calmodulin and dynein light chain LC8 in flagellar radial spokes. *J Cell Biol*, **153**,  
3 1315-26.
- 4 **Yoshida, M. and Yoshida, K.** (2011). Sperm chemotaxis and regulation of flagellar  
5 movement by Ca<sup>2+</sup>. *Mol Hum Reprod*, **17**, 457-65.
- 6

## FIGURES

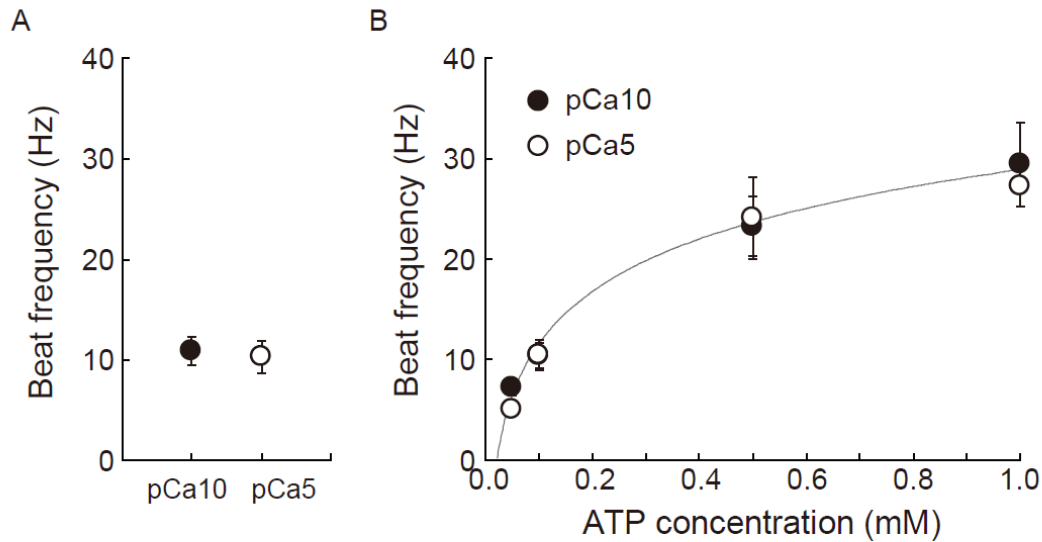

**Figure 1.** Estimation of the concentration of ATP released from caged ATP.

A: Beat frequency of demembrated *Ciona* sperm incubated with 1 mM caged ATP and activated by a 150 ms UV flash. N = 11 (pCa10), and N = 12 (pCa5). B: Beat frequency of demembrated and reactivated *Ciona* sperm by various concentrations of Mg-ATP. Closed and open circles show Ca<sup>2+</sup> concentrations in the reactivation solutions pCa10 and pCa5, respectively. N = 13–28 from three different experiments. Values are expressed as mean ± S.D.

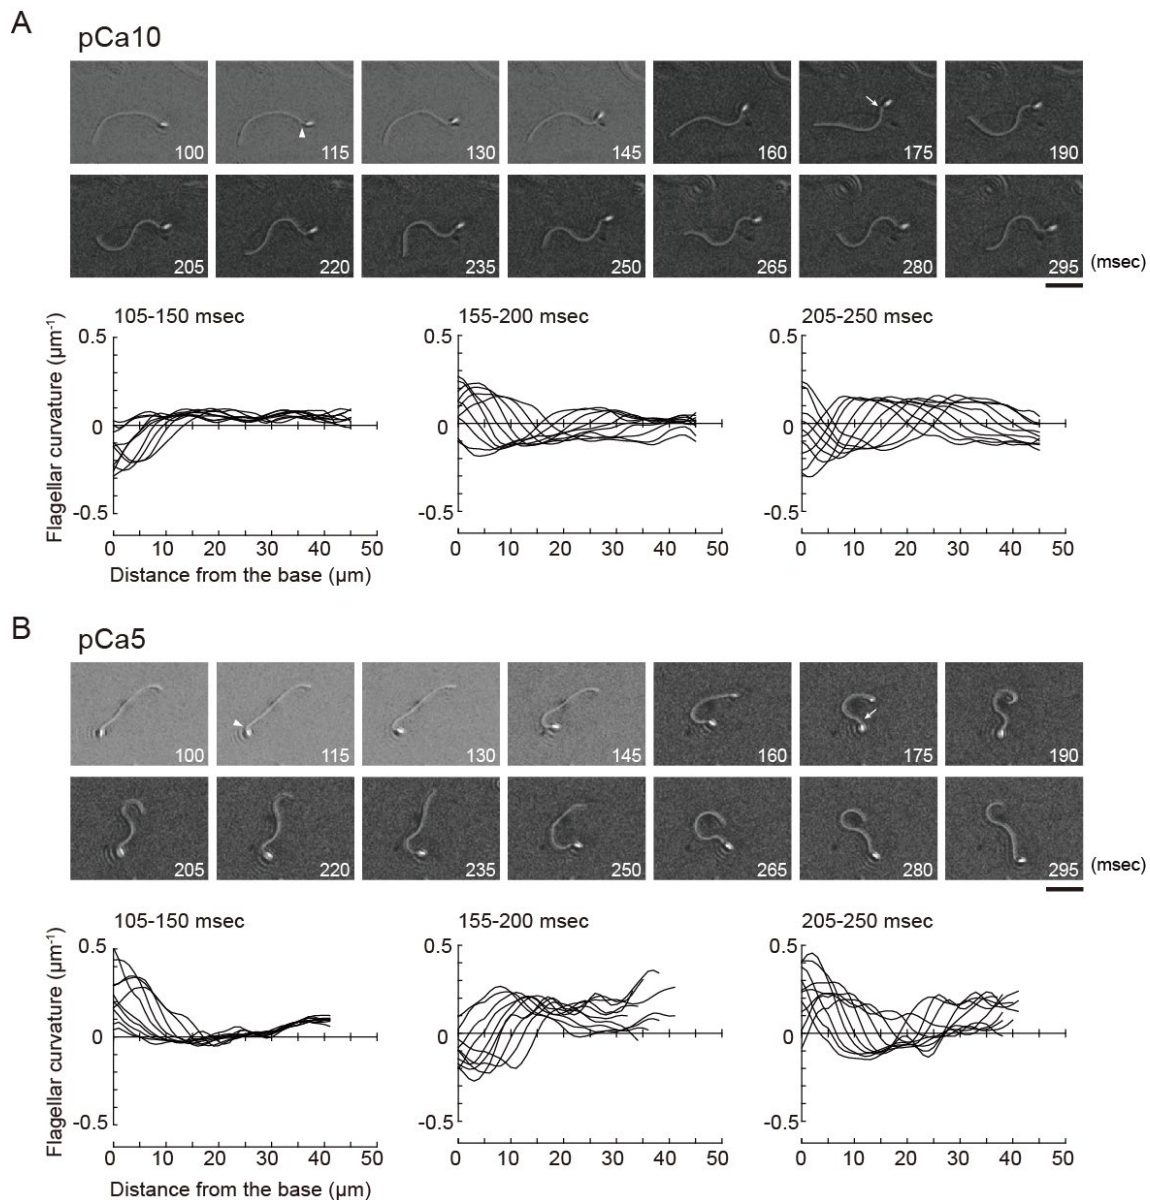

**Figure 2.** Generation of symmetric and asymmetric flagellar waveforms in *Ciona* sperm. Sperm cells were demembrated and reactivated through the photolysis of caged ATP in low (pCa10, A) or high (pCa5, B)  $\text{Ca}^{2+}$  concentrations. Upper panel: sequential images of sperm flagellar waveforms at 15 ms-intervals from 100 ms after the UV flash. Arrow heads and arrows indicate the initial bend and the second bend, respectively. Scale bar, 20  $\mu\text{m}$ . Lower panel: changes of flagellar curvature occurring 105–250 ms after the UV flash are plotted against the distance from the base of flagellum. Ten waveforms produced at 50 ms are overwritten. Symmetric and asymmetric waveforms were generated in low calcium concentrations (pCa10; A) and high calcium concentrations (pCa5; B), respectively.

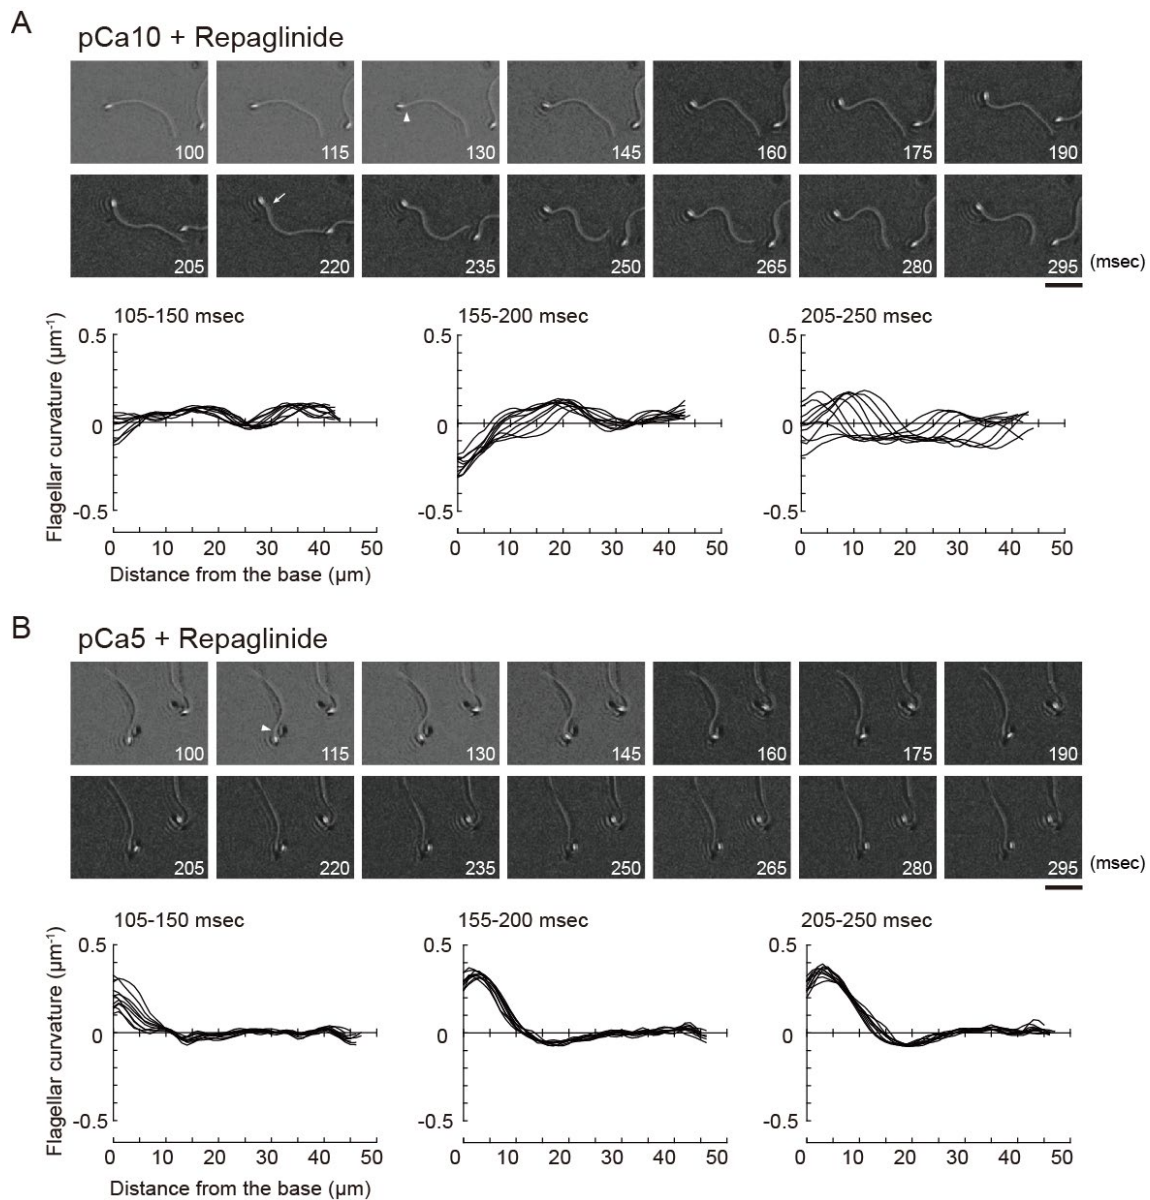

**Figure 3.** Effect of a calaxin inhibitor on the propagation of asymmetry waveforms at high calcium concentrations.

Sperm cells were demembranated and reactivated through the photolysis of caged ATP in low (pCa10, A) or high (pCa5, B)  $\text{Ca}^{2+}$  concentrations with 150  $\mu\text{M}$  repaglinide. Upper panel: sequential images of sperm flagellar waveforms at 15 ms-intervals from 100 ms after the UV flash. Arrow heads and arrows indicate the initial bend and the second bend, respectively. Scale bar, 20  $\mu\text{m}$ . Lower panel: changes of flagellar curvature occurring 105–250 ms after the UV flash are plotted against the distance from the base of flagellum. Ten waveforms produced at 50 ms are overwritten.

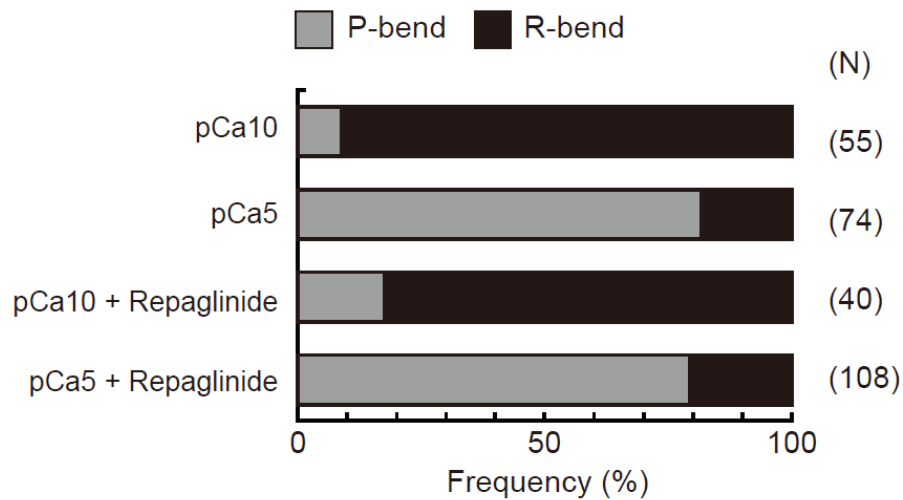

**Figure 4.** Role of the preferential direction of the initial bend in the generation of symmetric and asymmetric flagellar waveforms.

The relative frequencies of principal (P) and reverse (R) bends are shown for the initial bends formed after activation of demembrated *Ciona* sperm. Sperm was reactivated by photolysis of caged ATP in low (pCa10) or high (pCa5)  $\text{Ca}^{2+}$  concentrations in the presence of 0.5% DMSO (control) or 150  $\mu\text{M}$  repaglinide. In both control and repaglinide-treated sperm, the formation of flagellar bends started with R-bends at pCa10, whereas it started with P-bends at pCa5. The number in brackets represents the number of observed spermatozoa in three different experiments.

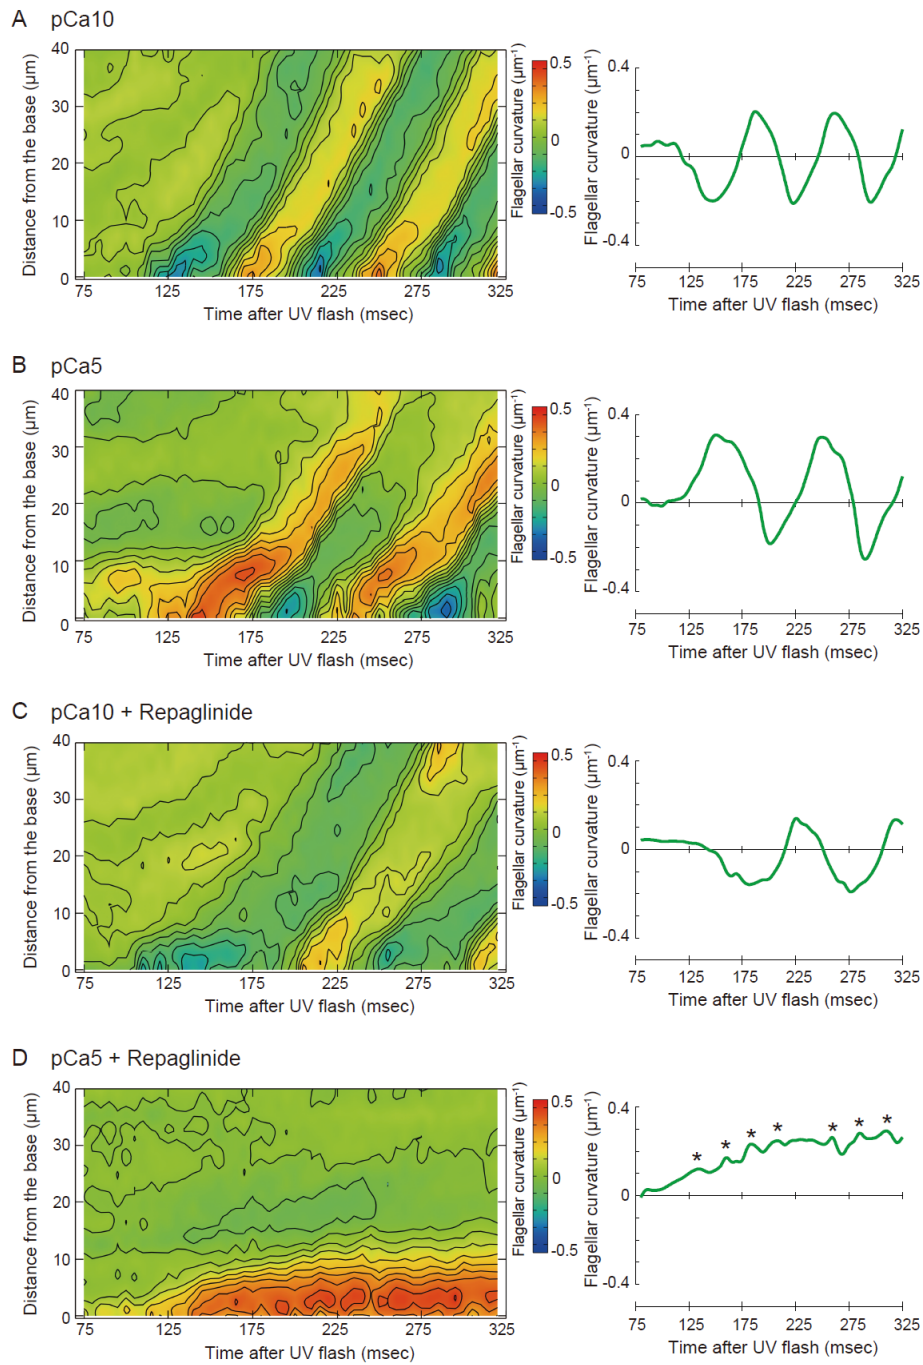

**Figure 5.** Pseudocolor maps showing spatiotemporal changes of the flagellar curvature. Left panels: the flagellar curvature of demembrated *Ciona* sperm was plotted against the distance from the base and time after the UV flash by pseudocolor mapping. Right panels: the flagellar curvature at 5 μm from the base was plotted against time after the UV flash. Sperm was reactivated through photolysis of caged ATP in low (pCa10; A, C) or high (pCa5; B, D) Ca<sup>2+</sup> concentrations in the presence of 0.5% DMSO (control; A, B) or 150 μM repaglinide (C, D).

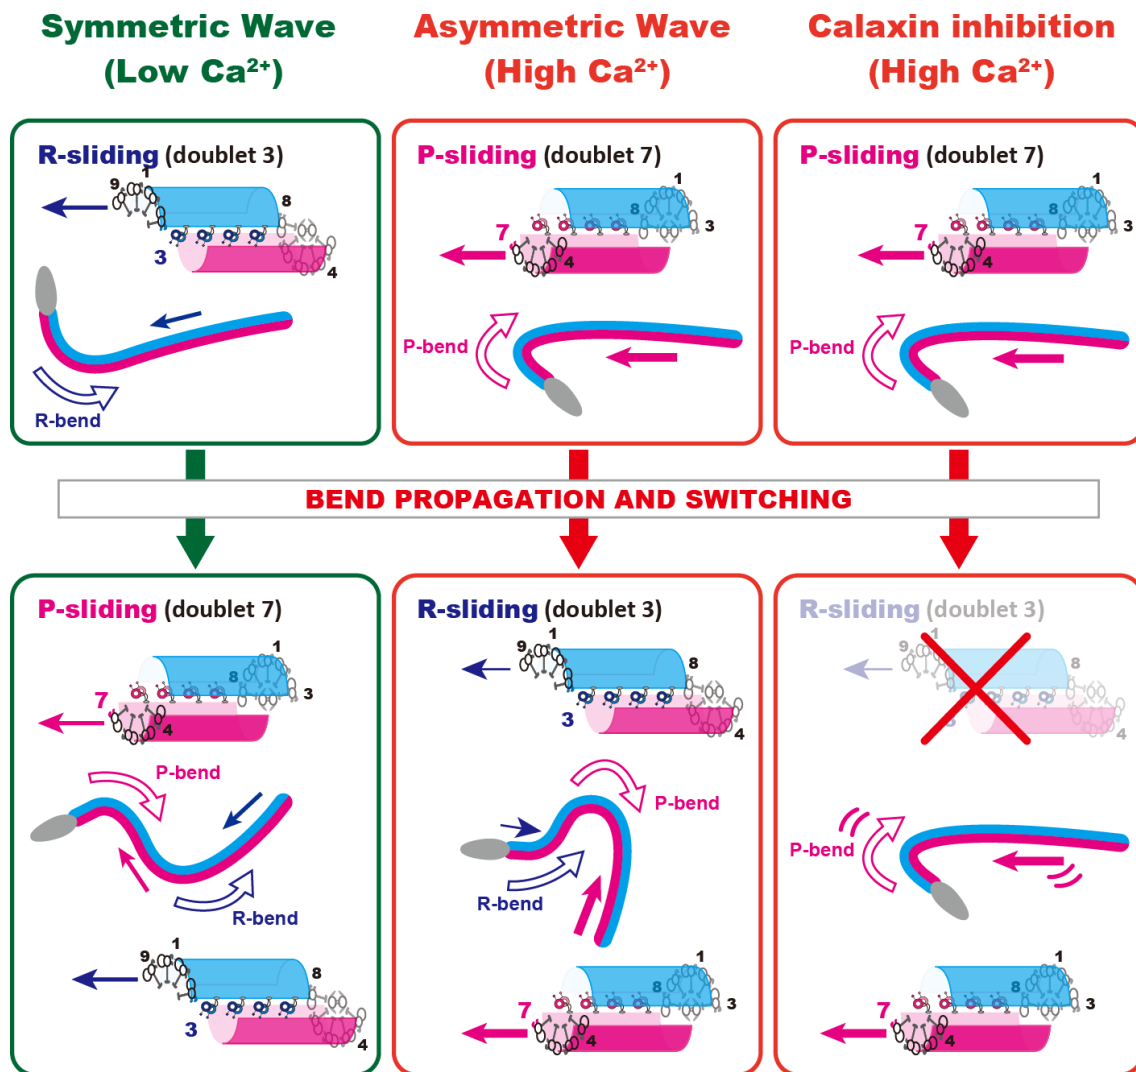

**Figure 6.** A model for calaxin-dependent transmission of asymmetric flagellar waves. The putative mechanisms mediating initial bend formation and its propagation are shown under different experimental conditions. Left: Formation of a symmetric wave under low  $\text{Ca}^{2+}$  conditions. The first R-bend is formed by microtubule sliding induced by doublet 3 dynein. In turn, this R-bend induces switching of active dynein from doublet 3 to 7, resulting in microtubule sliding induced by doublet 7 dynein to form a P-bend. Middle: Generation of an asymmetric wave under high  $\text{Ca}^{2+}$  conditions. A P-bend is first formed by microtubule sliding induced by doublet 7 dynein. In turn, this P-bend induces the switching of active dynein from doublet 7 to 3. However, the activity of doublet 3 dynein is suppressed by calaxin, resulting in the formation of an R-bend with lower curvature and in the subsequent production of an asymmetric wave. Dynein-driven microtubule sliding is known to be suppressed by calaxin at high  $\text{Ca}^{2+}$  concentrations; therefore, it is



plausible that a mechanism for the relief of calaxin-mediated inhibition on doublet 7 dynein is involved in P-bend formation (see text). Right: Effects of the calaxin inhibitor repaglinide on asymmetric wave formation under high  $\text{Ca}^{2+}$  conditions. An initial P-bend is normally formed. However, this does not propagate or trigger the formation of an R-bend. Repaglinide releases calaxin-dependent inhibition of microtubule sliding in the R-bend, but does not affect other putative calaxin-independent mechanisms for the regulation of microtubule sliding, such as the transmission of a feedback mechanical load from the P-bend.

**Table 1.** Sperm flagellar bending generated by the photolysis of caged ATP.

|                             | DMSO (Control)                  |                                 | Repaglinide                      |                                |
|-----------------------------|---------------------------------|---------------------------------|----------------------------------|--------------------------------|
|                             | pCa10                           | pCa5                            | pCa10                            | pCa5                           |
| Maximum curvature           |                                 |                                 |                                  | +++                            |
| ( $\mu\text{m}^{-1}$ )      | 0.211 $\pm$ 0.006 <sup>††</sup> | 0.320 $\pm$ 0.021 <sup>**</sup> | 0.127 $\pm$ 0.016 <sup>***</sup> | 0.279 $\pm$ 0.025 <sup>*</sup> |
| Curvature of initial        |                                 |                                 |                                  |                                |
| bend ( $\mu\text{m}^{-1}$ ) | -0.164 $\pm$ 0.011              | 0.279 $\pm$ 0.020               | -0.111 $\pm$ 0.037               | 0.185 $\pm$ 0.028 <sup>†</sup> |
| Time by initial bend        |                                 |                                 |                                  | +++                            |
| formation (ms)              | 139.00 $\pm$ 4.56               | 138.33 $\pm$ 5.23               | 190.00 $\pm$ 9.67 <sup>***</sup> | 168.13 $\pm$ 12.68             |
| Beat period (ms)            | 75.00 $\pm$ 4.69 <sup>†</sup>   | 88.89 $\pm$ 3.75 <sup>*</sup>   | 81.11 $\pm$ 3.75                 | 16.62 $\pm$ 1.21               |

Values are means  $\pm$  S.E. N=5-10. Flagellar bending was analyzed from successive 50 waveforms at 5 ms intervals. The curvature was determined at 5  $\mu\text{m}$  from the base. \*Significant at  $p < 0.05$ , \*\* $P < 0.01$  or \*\*\* $P < 0.001$  (Student's t-test) as compared with DMSO at pCa10. †Significant at  $p < 0.05$ , †† $P < 0.01$  or ††† $P < 0.001$  (Student's t-test) as compared with DMSO at pCa5. Curvature of initial bend was compared between DMSO and Repaglinide only.

## Supplementary information

**Movie S1:** Generation of symmetric flagellar waveforms in *Ciona* sperm. Sperm cells were demembranated and reactivated through the photolysis of caged ATP in low (pCa10)  $\text{Ca}^{2+}$  concentrations with 0.5% DMSO. The video is processed by background subtraction method and plays at a speed of 0.05x. Scale bar; 20  $\mu\text{m}$ . The character “UV” appears during UV irradiation.

**Movie S2:** Generation of asymmetric flagellar waveforms in *Ciona* sperm. Sperm cells were demembranated and reactivated through the photolysis of caged ATP in high (pCa5)  $\text{Ca}^{2+}$  concentrations with 0.5% DMSO. The video is processed by background subtraction method and plays at a speed of 0.05x. The character “UV” appears during UV irradiation.

**Movie S3:** Generation of symmetric flagellar waveforms in *Ciona* sperm. Sperm cells were demembranated and reactivated through the photolysis of caged ATP in low (pCa10)  $\text{Ca}^{2+}$  concentrations with 150  $\mu\text{M}$  repaglinide. The video is processed by background subtraction method and plays at a speed of 0.05x. The character “UV” appears during UV irradiation.

**Movie S4:** Generation of asymmetric flagellar waveforms in *Ciona* sperm is inhibited by calaxin blocker. Sperm cells were demembranated and reactivated through the photolysis of caged ATP in high (pCa5)  $\text{Ca}^{2+}$  concentrations with 150  $\mu\text{M}$  repaglinide. The video plays at a speed of 0.05x. Scale bar; 20  $\mu\text{m}$ . The character “UV” appears during UV irradiation.
